# Supplementary material for: Epigenomic analysis of formalin-fixed paraffin-embedded samples by CUT&Tag
Source: PubMed Central journal article supplement (PMC10516967; doi:10.1038/s41467-023-41666-z), 2023-09-22
Supplement: 41467_2023_41666_MOESM12_ESM.pdf [file 41467_2023_41666_MOESM12_ESM.pdf]

## Reporting Summary

Nature Portfolio wishes to improve the reproducibility of the work that we publish. This form provides structure for consistency and transparency in reporting. For further information on Nature Portfolio policies, see our [Editorial Policies](#) and the [Editorial Policy Checklist](#).

### Statistics

For all statistical analyses, confirm that the following items are present in the figure legend, table legend, main text, or Methods section.

- |                                     |                                                                                                                                                                                                                                                                                                |
|-------------------------------------|------------------------------------------------------------------------------------------------------------------------------------------------------------------------------------------------------------------------------------------------------------------------------------------------|
| n/a                                 | Confirmed                                                                                                                                                                                                                                                                                      |
| <input type="checkbox"/>            | <input checked="" type="checkbox"/> The exact sample size ( $n$ ) for each experimental group/condition, given as a discrete number and unit of measurement                                                                                                                                    |
| <input checked="" type="checkbox"/> | <input type="checkbox"/> A statement on whether measurements were taken from distinct samples or whether the same sample was measured repeatedly                                                                                                                                               |
| <input type="checkbox"/>            | <input checked="" type="checkbox"/> The statistical test(s) used AND whether they are one- or two-sided<br><i>Only common tests should be described solely by name; describe more complex techniques in the Methods section.</i>                                                               |
| <input checked="" type="checkbox"/> | <input type="checkbox"/> A description of all covariates tested                                                                                                                                                                                                                                |
| <input checked="" type="checkbox"/> | <input type="checkbox"/> A description of any assumptions or corrections, such as tests of normality and adjustment for multiple comparisons                                                                                                                                                   |
| <input type="checkbox"/>            | <input checked="" type="checkbox"/> A full description of the statistical parameters including central tendency (e.g. means) or other basic estimates (e.g. regression coefficient) AND variation (e.g. standard deviation) or associated estimates of uncertainty (e.g. confidence intervals) |
| <input type="checkbox"/>            | <input checked="" type="checkbox"/> For null hypothesis testing, the test statistic (e.g. $F$ , $t$ , $r$ ) with confidence intervals, effect sizes, degrees of freedom and $P$ value noted<br><i>Give <math>P</math> values as exact values whenever suitable.</i>                            |
| <input checked="" type="checkbox"/> | <input type="checkbox"/> For Bayesian analysis, information on the choice of priors and Markov chain Monte Carlo settings                                                                                                                                                                      |
| <input checked="" type="checkbox"/> | <input type="checkbox"/> For hierarchical and complex designs, identification of the appropriate level for tests and full reporting of outcomes                                                                                                                                                |
| <input checked="" type="checkbox"/> | <input type="checkbox"/> Estimates of effect sizes (e.g. Cohen's $d$ , Pearson's $r$ ), indicating how they were calculated                                                                                                                                                                    |

*Our web collection on [statistics for biologists](#) contains articles on many of the points above.*

### Software and code

Policy information about [availability of computer code](#)

#### Data collection

The size distributions and molar concentration of libraries were determined using an Agilent 4200 TapeStation. Up to 48 barcoded CUT&RUN libraries or 96 barcoded CUT&Tag libraries were pooled at approximately equimolar concentration for sequencing. Paired-end 50x50 bp sequencing on the Illumina NextSeq 2000 platform was performed by the Fred Hutchinson Cancer Research Center Genomics Shared Resources. This yielded 1-20 million reads per antibody. Adapters were clipped by cutadapt version 4.1 (51) with parameters `-j 8 --nextseq-trim 20 -m 20 -a AGATCGGAAGAGCACACGTCTGAACTCCAGTCA -A AGATCGGAAGAGCGTCGTGTAGGGAAAGAGTGT -Z`. Clipped reads were aligned by Bowtie2 version 2.4.4 to the *Mus musculus* mm10 and *Homo sapiens* hg19 reference sequences from UCSC and to the *Rhodococcus erythropolis* complete genome (NZ\_CP007255.1) from NCBI with parameters `--very-sensitive-local --soft-clipped-unmapped-tlen --dovetail --no-mixed --no-discordant -q --phred33 -l 10 -X 1000`

#### Data analysis

Bedtools; Voom/Limma option on the Degust server <https://degust.erc.monash.edu/degust/>. Picard Tools: MarkDuplicates <http://broadinstitute.github.io/picard/>

For manuscripts utilizing custom algorithms or software that are central to the research but not yet described in published literature, software must be made available to editors and reviewers. We strongly encourage code deposition in a community repository (e.g. GitHub). See the Nature Portfolio [guidelines for submitting code & software](#) for further information.

## Data

Policy information about [availability of data](#)

All manuscripts must include a [data availability statement](#). This statement should provide the following information, where applicable:

- Accession codes, unique identifiers, or web links for publicly available datasets
- A description of any restrictions on data availability
- For clinical datasets or third party data, please ensure that the statement adheres to our [policy](#)

All primary sequencing data have been deposited as paired-end fastq files in Gene Expression Omnibus under the accession code GSE224579.

## Research involving human participants, their data, or biological material

Policy information about studies with [human participants or human data](#). See also policy information about [sex, gender \(identity/presentation\), and sexual orientation](#) and [race, ethnicity and racism](#).

|                                                                    |                |
|--------------------------------------------------------------------|----------------|
| Reporting on sex and gender                                        | Not applicable |
| Reporting on race, ethnicity, or other socially relevant groupings | Not applicable |
| Population characteristics                                         | Not applicable |
| Recruitment                                                        | Not applicable |
| Ethics oversight                                                   | Not applicable |

Note that full information on the approval of the study protocol must also be provided in the manuscript.

## Field-specific reporting

Please select the one below that is the best fit for your research. If you are not sure, read the appropriate sections before making your selection.

- Life sciences       Behavioural & social sciences       Ecological, evolutionary & environmental sciences

For a reference copy of the document with all sections, see [nature.com/documents/nr-reporting-summary-flat.pdf](https://www.nature.com/documents/nr-reporting-summary-flat.pdf)

## Life sciences study design

All studies must disclose on these points even when the disclosure is negative.

|                 |                                                                                                                                                                                                                                                                                                                                                     |
|-----------------|-----------------------------------------------------------------------------------------------------------------------------------------------------------------------------------------------------------------------------------------------------------------------------------------------------------------------------------------------------|
| Sample size     | One 5 or 10 micron section from an FFPE block or a dissected portion of an FFPE for each 5- or 10-micron specimen used in Voom/Limma analysis. Sample sizes were not determined in advance but rather by the amount of tissue on a section divided by the number of samples from the section.                                                       |
| Data exclusions | Sequencing reads mapping to the mitochondrial genome were removed from all datasets. This was pre-established and is standard practice in the field. The purpose of this study was to perform comparative analysis of chromatin profiles from the nuclear genome and this can be confounded by variable read numbers from the mitochondrial genome. |
| Replication     | For Voom/Limma analysis at least 2 replicates were used. Replicates were successful.                                                                                                                                                                                                                                                                |
| Randomization   | n/a. The data and analysis for this study is objective and not prone to influence by the researchers bias.                                                                                                                                                                                                                                          |
| Blinding        | n/a. The data and analysis for this study is objective and not prone to influence by researchers bias.                                                                                                                                                                                                                                              |

## Reporting for specific materials, systems and methods

We require information from authors about some types of materials, experimental systems and methods used in many studies. Here, indicate whether each material, system or method listed is relevant to your study. If you are not sure if a list item applies to your research, read the appropriate section before selecting a response.

## Materials &amp; experimental systems

## Methods

- n/a  Involved in the study
- Antibodies
- Eukaryotic cell lines
- Palaeontology and archaeology
- Animals and other organisms
- Clinical data
- Dual use research of concern
- Plants

- n/a  Involved in the study
- ChIP-seq
- Flow cytometry
- MRI-based neuroimaging

## Antibodies

|                 |                                                                                                                                                                                                                                                                                                                                                                                                                                                                                                                                                                                                                                                                                                                                                                                                                                                                                                                                                                                                                                                                                                                                                                                                                                                                                                                                                                                                                                                                                                                                                                                                                                                                                           |
|-----------------|-------------------------------------------------------------------------------------------------------------------------------------------------------------------------------------------------------------------------------------------------------------------------------------------------------------------------------------------------------------------------------------------------------------------------------------------------------------------------------------------------------------------------------------------------------------------------------------------------------------------------------------------------------------------------------------------------------------------------------------------------------------------------------------------------------------------------------------------------------------------------------------------------------------------------------------------------------------------------------------------------------------------------------------------------------------------------------------------------------------------------------------------------------------------------------------------------------------------------------------------------------------------------------------------------------------------------------------------------------------------------------------------------------------------------------------------------------------------------------------------------------------------------------------------------------------------------------------------------------------------------------------------------------------------------------------------|
| Antibodies used | Primary antibodies: H3K4me3: Active Motif cat. no. 39159, lot no. 18122006; H3K27ac: Abcam cat. no. ab4729, lot no. 1033973; RNAPII-Ser5p: Cell Signaling Technologies cat. no. 13523, lot 3; RNAPII-Ser2,5p: Cell Signaling Technologies cat. no. 13546, lot 1; H3K27me3: Cell Signaling Technologies cat. no. 9733, lot 19; H3K4me2: Epicypher cat. no. 13-0027, lot 21090003-01; H3K36me3: Thermo cat. no. MAS-24687, lot VE2997961. Secondary antibody: Guinea pig $\alpha$ -rabbit antibody (Antibodies online cat. no. ABIN101961, lot 46671).                                                                                                                                                                                                                                                                                                                                                                                                                                                                                                                                                                                                                                                                                                                                                                                                                                                                                                                                                                                                                                                                                                                                      |
| Validation      | All antibodies used in this study were confirmed by the manufacturer to recognize the epitope as stated on the manufacturer's website. Links to manufacturer's validations: H3K4me3: <a href="https://www.activemotif.com/catalog/details/39159/histone-h3-trimethyl-lys4-antibody-pab">https://www.activemotif.com/catalog/details/39159/histone-h3-trimethyl-lys4-antibody-pab</a> ; H3K27ac: <a href="https://www.abcam.com/products/primary-antibodies/histone-h3-acetyl-k27-antibody-chip-grade-ab4729.html#lb">https://www.abcam.com/products/primary-antibodies/histone-h3-acetyl-k27-antibody-chip-grade-ab4729.html#lb</a> RNAPII-Ser5p: Cell Signaling Technologies cat. no. 13523, lot 3; RNAPII-Ser2,5p: Cell Signaling Technologies cat. no. 13546: <a href="https://www.cellsignal.com/products/primary-antibodies/phospho-rpb1-ctd-ser2-ser5-d1g3k-rabbit-mab/13546?_requestid=265202">https://www.cellsignal.com/products/primary-antibodies/phospho-rpb1-ctd-ser2-ser5-d1g3k-rabbit-mab/13546?_requestid=265202</a> ; H3K27me3: <a href="https://www.cellsignal.com/products/primary-antibodies/tri-methyl-histone-h3-lys27-c36b11-rabbit-mab/9733">https://www.cellsignal.com/products/primary-antibodies/tri-methyl-histone-h3-lys27-c36b11-rabbit-mab/9733</a> ; H3K4me2: <a href="https://www.epicypher.com/content/documents/tds/13-0027.pdf">https://www.epicypher.com/content/documents/tds/13-0027.pdf</a> ; H3K36me3: <a href="https://www.thermofisher.com/antibody/product/H3K36me3-Antibody-clone-RM155-Recombinant-Monoclonal/MAS-24687">https://www.thermofisher.com/antibody/product/H3K36me3-Antibody-clone-RM155-Recombinant-Monoclonal/MAS-24687</a> . |

## Eukaryotic cell lines

Policy information about [cell lines and Sex and Gender in Research](#)

|                                                                   |                                                                                                                                                                                                                        |
|-------------------------------------------------------------------|------------------------------------------------------------------------------------------------------------------------------------------------------------------------------------------------------------------------|
| Cell line source(s)                                               | Human K562 cells were purchased from ATCC (Manassas, VA, Cat# CCL-243), H1 hESCs were obtained from WiCell (Cat# WA01-lot# WB35186), Mouse 3T3 cells were obtained from the Sarthy lab at Seattle Children's Hospital. |
| Authentication                                                    | All the cell lines used in this study are regularly submitted for karyotyping by the Fred Hutchinson Cancer Center Core Facilities.                                                                                    |
| Mycoplasma contamination                                          | All cell lines were confirmed as mycoplasma negative on a tri-monthly basis.                                                                                                                                           |
| Commonly misidentified lines (See <a href="#">ICLAC</a> register) | No commonly misidentified lines were used in this study.                                                                                                                                                               |

## Animals and other research organisms

Policy information about [studies involving animals](#); [ARRIVE guidelines](#) recommended for reporting animal research, and [Sex and Gender in Research](#)

|                         |                                                                                                                                                                                                                                                                                                                                                                                                                                                                                                                                                                                                                                                                                                                                                                                                                                                                            |
|-------------------------|----------------------------------------------------------------------------------------------------------------------------------------------------------------------------------------------------------------------------------------------------------------------------------------------------------------------------------------------------------------------------------------------------------------------------------------------------------------------------------------------------------------------------------------------------------------------------------------------------------------------------------------------------------------------------------------------------------------------------------------------------------------------------------------------------------------------------------------------------------------------------|
| Laboratory animals      | We used both male and female mice from Jackson lab mouse strain 3529: <a href="https://www.jax.org/strain/003529">https://www.jax.org/strain/003529</a> (FVB/N;C57BL/6;129/Sv). Nestin (N)/tv-a Cdkn2a null pups (P0-P1; male and female) or adults (5-7 week old, male and female) were injected intracranially with either RCAS-PDGFB, RCAS-YAP1-FAM118B, or RCAS-ZFTA-RELA-expressing DF-1 cells and monitored daily for tumor related symptoms for the duration of the experiment. Upon weaning (~P21), mice were housed with same-sex littermates, with no more than 5 per cage and given access to food/water ad libitum. All animal experiments were approved by and conducted in accordance with the Institutional Animal Care and Use Committee of Fred Hutchinson Cancer Center (Protocol #50842: Tva-derived transgenic mouse model for studying brain tumors). |
| Wild animals            | No wild animals were used in this study.                                                                                                                                                                                                                                                                                                                                                                                                                                                                                                                                                                                                                                                                                                                                                                                                                                   |
| Reporting on sex        | We used both male and female mice.                                                                                                                                                                                                                                                                                                                                                                                                                                                                                                                                                                                                                                                                                                                                                                                                                                         |
| Field-collected samples | No field-collected samples were used in this study.                                                                                                                                                                                                                                                                                                                                                                                                                                                                                                                                                                                                                                                                                                                                                                                                                        |
| Ethics oversight        | This research was approved by the Fred Hutch Institutional Animal Care and Use Committee (Protocol # 50842) and complies with all required ethical regulations.                                                                                                                                                                                                                                                                                                                                                                                                                                                                                                                                                                                                                                                                                                            |

Note that full information on the approval of the study protocol must also be provided in the manuscript.

## Plants

|                       |                |
|-----------------------|----------------|
| Seed stocks           | Not applicable |
| Novel plant genotypes | Not applicable |
| Authentication        | Not applicable |

## ChIP-seq

## Data deposition

- Confirm that both raw and final processed data have been deposited in a public database such as [GEO](#).
- Confirm that you have deposited or provided access to graph files (e.g. BED files) for the called peaks.

## Data access links

May remain private before publication.

For "Initial submission" or "Revised version" documents, provide reviewer access links. For your "Final submission" document, provide a link to the deposited data.

## Files in database submission

GSE235876 Epigenomic analysis of Formalin-Fixed Paraffin-Embedded samples by CUT&Tag

GSM7511134 3T3\_H3K27me3\_3T3\_nuclei\_(230417\_SH\_Mm\_K27m3\_3T3\_0405)

GSM7511135 3T3\_H3K36me3\_3T3\_nuclei\_(230417\_SH\_Mm\_K36m3\_3T3\_0405)

GSM7511136 3T3\_H3K4me2\_3T3\_nuclei\_(230417\_SH\_Mm\_K4m2\_3T3\_0405)

GSM7511137 3T3\_H3K4me3\_3T3\_nuclei\_(230417\_SH\_Mm\_K4m3\_3T3\_0405)

GSM7511138 3T3\_RNAPol2-Ser5\_3T3\_nuclei\_(230417\_SH\_Mm\_P2S5\_3T3\_0405)

GSM7511139 H3K27ac\_Normal\_brain\_1\_(230404\_SH\_Mm\_K27ac\_N1\_0330)

GSM7511140 H3K27ac\_Normal\_brain\_1\_high\_(230512\_SH\_Mm\_K27ac\_N1H\_0506)

GSM7511141 H3K27ac\_Normal\_brain\_1\_low\_(230512\_SH\_Mm\_K27ac\_N1L\_0506)

GSM7511142 H3K27ac\_Normal\_brain\_2\_(230410\_SH\_Mm\_K27ac\_N2I\_0401)

GSM7511143 H3K27ac\_Normal\_brain\_2\_high\_(230512\_SH\_Mm\_K27ac\_N2H\_0506)

GSM7511144 H3K27ac\_Normal\_brain\_2\_low\_(230512\_SH\_Mm\_K27ac\_N2L\_0506)

GSM7511145 H3K27ac\_Normal\_brain\_3\_(230404\_SH\_Mm\_K27ac\_N3\_0330)

GSM7511146 H3K27ac\_Normal\_brain\_3\_high\_(230512\_SH\_Mm\_K27ac\_N3H\_0506)

GSM7511147 H3K27ac\_Normal\_brain\_3\_low\_(230512\_SH\_Mm\_K27ac\_N3L\_0506)

GSM7511148 H3K27ac\_Normal\_brain\_mineraloil\_(230428\_SH\_Mm\_K27ac\_N80m\_0425)

GSM7511149 H3K27ac\_PDGFB\_3\_(230404\_SH\_Mm\_K27ac\_P\_0330)

GSM7511150 H3K27ac\_PDGFB\_SDS\_(230321\_SH\_Mm\_K27ac\_PS\_0319)

GSM7511151 H3K27ac\_PDGFB\_Triton\_(230321\_SH\_Mm\_K27ac\_PT\_0319)

GSM7511152 H3K27ac\_PDGFB\_high\_(230512\_SH\_Mm\_K27ac\_PH\_0506)

GSM7511153 H3K27ac\_PDGFB\_low\_(230512\_SH\_Mm\_K27ac\_PL\_0506)

GSM7511154 H3K27ac\_RELA\_1\_(230410\_SH\_Mm\_K27ac\_R1\_0401)

GSM7511155 H3K27ac\_RELA\_2\_(230410\_SH\_Mm\_K27ac\_R2\_0401)

GSM7511156 H3K27ac\_RELA\_3\_(230404\_SH\_Mm\_K27ac\_R\_0330)

GSM7511157 H3K27ac\_RELA\_4\_(230410\_SH\_Mm\_K27ac\_R4\_0401)

GSM7511158 H3K27ac\_RELA\_8\_(230410\_SH\_Mm\_K27ac\_R8\_0401)

GSM7511159 H3K27ac\_RELA\_high\_(230512\_SH\_Mm\_K27ac\_RH\_0506)

GSM7511160 H3K27ac\_RELA\_low\_(230512\_SH\_Mm\_K27ac\_RL\_0506)

GSM7511161 H3K27ac\_YAP1\_1\_(230404\_SH\_Mm\_K27ac\_Y1\_0330)

GSM7511162 H3K27ac\_YAP1\_11\_(230410\_SH\_Mm\_K27ac\_Y11\_0401)

GSM7511163 H3K27ac\_YAP1\_12\_(230410\_SH\_Mm\_K27ac\_Y12\_0401)

GSM7511164 H3K27ac\_YAP1\_14\_(230410\_SH\_Mm\_K27ac\_Y14\_0401)

GSM7511165 H3K27ac\_YAP1\_18\_(230410\_SH\_Mm\_K27ac\_Y18\_0401)

GSM7511166 H3K27ac\_YAP1\_2\_(230404\_SH\_Mm\_K27ac\_Y2\_0330)

GSM7511167 H3K27ac\_YAP1\_3\_(230404\_SH\_Mm\_K27ac\_Y3\_0330)

GSM7511168 H3K27ac\_YAP1\_high\_(230512\_SH\_Mm\_K27ac\_Y1H\_0506)

GSM7511169 H3K27ac\_YAP1\_low\_(230512\_SH\_Mm\_K27ac\_Y1L\_0506)

GSM7511170 H3K27ac\_YAP2\_high\_(230512\_SH\_Mm\_K27ac\_Y2H\_0506)

GSM7511171 H3K27ac\_YAP2\_low\_(230512\_SH\_Mm\_K27ac\_Y2L\_0506)

GSM7511172 H3K27ac\_YAP3\_high\_(230512\_SH\_Mm\_K27ac\_Y3H\_0506)

GSM7511173 K27ac\_PDGFB\_1\_(230301\_SH\_Mm\_KaCl\_PD-B5\_0219)

GSM7511174 K27ac\_PDGFB\_2\_(230308\_SH\_Mm\_K27ac\_Rx8\_0225)

GSM7511175 K27ac\_RELA\_1\_(230308\_SH\_Mm\_K27ac\_Px8\_0225)

GSM7511176 RNAPol2-Ser25\_Normal\_brain\_1\_high\_(230512\_SH\_Mm\_P2S25\_N1H\_0506)

GSM7511177 RNAPol2-Ser25\_Normal\_brain\_1\_low\_(230512\_SH\_Mm\_P2S25\_N1L\_0506)

GSM7511178 RNAPol2-Ser25\_Normal\_brain\_2\_high\_(230512\_SH\_Mm\_P2S25\_N2H\_0506)

GSM7511179 RNAPol2-Ser25\_Normal\_brain\_3\_high\_(230512\_SH\_Mm\_P2S25\_N3H\_0506)

GSM7511180 RNAPol2-Ser25\_Normal\_brain\_3\_low\_(230512\_SH\_Mm\_P2S25\_N3L\_0506)

GSM7511181 RNAPol2-Ser25\_PDGFB\_1\_(230308\_SH\_Mm\_P2S25\_Px8\_0225)

GSM7511182 RNAPol2-Ser25\_PDGFB\_6\_(230428\_SH\_Mm\_P2S25\_P85\_0422)

GSM7511183 RNAPol2-Ser25\_PDGFB\_high\_(230512\_SH\_Mm\_P2S25\_PH\_0506)

GSM7511184 RNAPol2-Ser25\_PDGFB\_low\_(230512\_SH\_Mm\_P2S25\_PL\_0506)

GSM7511185 RNAPol2-Ser25\_RELA\_1\_(230308\_SH\_Mm\_P2S25\_Rx8\_0225)

GSM7511186 RNAPol2-Ser25\_RELA\_5\_(230417\_SH\_Mm\_P2S25\_RLo\_0408)

|            |                                                                           |
|------------|---------------------------------------------------------------------------|
| GSM7511187 | RNAPol2-Ser25_RELA_high_(230512_SH_Mm_P2S25_RH_0506)                      |
| GSM7511188 | RNAPol2-Ser25_RELA_low_(230512_SH_Mm_P2S25_RI_0506)                       |
| GSM7511189 | RNAPol2-Ser25_YAP1_high_(230512_SH_Mm_P2S25_Y1H_0506)                     |
| GSM7511190 | RNAPol2-Ser25_YAP1_low_(230512_SH_Mm_P2S25_Y1L_0506)                      |
| GSM7511191 | RNAPol2-Ser25_YAP2_high_(230512_SH_Mm_P2S25_Y2H_0506)                     |
| GSM7511192 | RNAPol2-Ser25_YAP2_low_(230512_SH_Mm_P2S25_Y2L_0506)                      |
| GSM7511193 | RNAPol2-Ser25_YAP3_high_(230512_SH_Mm_P2S25_Y3H_0506)                     |
| GSM7511194 | RNAPol2-Ser25_YAP3_low_(230512_SH_Mm_P2S25_Y3L_0506)                      |
| GSM7511195 | RNAPol2-Ser525_Normal_brain_1_high_(230512_SH_Mm_P2S525_N1H_0506)         |
| GSM7511196 | RNAPol2-Ser525_Normal_brain_1_low_(230512_SH_Mm_P2S525_N1L_0506)          |
| GSM7511197 | RNAPol2-Ser525_Normal_brain_2_high_(230512_SH_Mm_P2S525_N2H_0506)         |
| GSM7511198 | RNAPol2-Ser525_Normal_brain_3_low_(230512_SH_Mm_P2S525_N3L_0506)          |
| GSM7511199 | RNAPol2-Ser525_PDGFb_high_(230512_SH_Mm_P2S525_PH_0506)                   |
| GSM7511200 | RNAPol2-Ser525_PDGFb_low_(230512_SH_Mm_P2S525_PL_0506)                    |
| GSM7511201 | RNAPol2-Ser525_RELA_high_(230512_SH_Mm_P2S525_RH_0506)                    |
| GSM7511202 | RNAPol2-Ser525_RELA_low_(230512_SH_Mm_P2S525_RI_0506)                     |
| GSM7511203 | RNAPol2-Ser525_YAP1_(230512_SH_Mm_P2S525_Y1_0506)                         |
| GSM7511204 | RNAPol2-Ser525_YAP1_high_(230512_SH_Mm_P2S525_Y1H_0506)                   |
| GSM7511205 | RNAPol2-Ser525_YAP2_high_(230512_SH_Mm_P2S525_Y2H_0506)                   |
| GSM7511206 | RNAPol2-Ser525_YAP2_low_(230512_SH_Mm_P2S525_Y2L_0506)                    |
| GSM7511207 | RNAPol2-Ser525_YAP3_high_(230512_SH_Mm_P2S525_Y3H_0506)                   |
| GSM7511208 | RNAPol2-Ser525_YAP3_low_(230512_SH_Mm_P2S525_Y3L_0506)                    |
| GSM7511209 | RNAPol2-Ser525_cholangiocarcinoma_C3_(230612_RP_Mm_20230526_FFPE_O652_C3) |
| GSM7511210 | RNAPol2-Ser525_cholangiocarcinoma_D3_(230612_RP_Mm_20230526_FFPE_O652_D3) |
| GSM7511211 | RNAPol2-Ser525_cholangiocarcinoma_F1_(230612_RP_Mm_20230524_FFPE_O651_F1) |
| GSM7511212 | RNAPol2-Ser525_cholangiocarcinoma_G1_(230612_RP_Mm_20230524_FFPE_O651_G1) |
| GSM7511213 | RNAPol2-Ser525_cholangiocarcinoma_G3_(230612_RP_Mm_20230526_FFPE_O652_G3) |
| GSM7511214 | RNAPol2-Ser525_cholangiocarcinoma_H1_(230612_RP_Mm_20230524_FFPE_O651_H1) |
| GSM7511215 | RNAPol2-Ser525_cholangiocarcinoma_H3_(230612_RP_Mm_20230526_FFPE_O652_H3) |
| GSM7511216 | RNAPol2-Ser525_liver_A10_(230612_RP_Mm_20230520_FFPE_6541_A10)            |
| GSM7511217 | RNAPol2-Ser525_liver_A12_(230612_RP_Mm_20230520_FFPE_6541_A12)            |
| GSM7511218 | RNAPol2-Ser525_liver_B10_(230612_RP_Mm_20230520_FFPE_6541_B10)            |
| GSM7511219 | RNAPol2-Ser525_liver_B12_(230612_RP_Mm_20230520_FFPE_6541_B12)            |
| GSM7511220 | RNAPol2-Ser525_liver_C10_(230612_RP_Mm_20230520_FFPE_6541_C10)            |
| GSM7511221 | RNAPol2-Ser525_liver_C12_(230612_RP_Mm_20230520_FFPE_6541_C12)            |
| GSM7511222 | RNAPol2-Ser5_Normal_brain_1_(230410_SH_Mm_P2S5_N1_0330)                   |
| GSM7511223 | RNAPol2-Ser5_Normal_brain_1_high_(230512_SH_Mm_P2S5_N1H_0506)             |
| GSM7511224 | RNAPol2-Ser5_Normal_brain_2_(230503_SH_Mm_P2S5_N95-2_0429)                |
| GSM7511225 | RNAPol2-Ser5_Normal_brain_2_high_(230512_SH_Mm_P2S5_N2H_0506)             |
| GSM7511226 | RNAPol2-Ser5_Normal_brain_2_low_(230512_SH_Mm_P2S5_N2L_0506)              |
| GSM7511227 | RNAPol2-Ser5_Normal_brain_3_(230503_SH_Mm_P2S5_N95-12_0429)               |
| GSM7511228 | RNAPol2-Ser5_Normal_brain_3_high_(230512_SH_Mm_P2S5_N3H_0506)             |
| GSM7511229 | RNAPol2-Ser5_Normal_brain_3_low_(230512_SH_Mm_P2S5_N3L_0506)              |
| GSM7511230 | RNAPol2-Ser5_Normal_brain_4_(230503_SH_Mm_P2S5_N90-2_0429)                |
| GSM7511231 | RNAPol2-Ser5_Normal_brain_5_(230503_SH_Mm_P2S5_N85-4_0429)                |
| GSM7511232 | RNAPol2-Ser5_Normal_brain_6_(230503_SH_Mm_P2S5_N85-12_0429)               |
| GSM7511233 | RNAPol2-Ser5_Normal_brain_7_(230503_SH_Mm_P2S5_N80-4_0429)                |
| GSM7511234 | RNAPol2-Ser5_Normal_brain_8_(230503_SH_Mm_P2S5_N80-12_0429)               |
| GSM7511235 | RNAPol2-Ser5_PDGFb_1_(230410_SH_Mm_P2S5_P_0330)                           |
| GSM7511236 | RNAPol2-Ser5_PDGFb_4_(230428_SH_Mm_P2S5_P80_0422)                         |
| GSM7511237 | RNAPol2-Ser5_PDGFb_5_(230428_SH_Mm_P2S5_P85_0422)                         |
| GSM7511238 | RNAPol2-Ser5_PDGFb_high_(230512_SH_Mm_P2S5_PH_0506)                       |
| GSM7511239 | RNAPol2-Ser5_PDGFb_low_(230512_SH_Mm_P2S5_PL_0506)                        |
| GSM7511240 | RNAPol2-Ser5_RELA_3_(230321_SH_Mm_P2S5_RS_0319)                           |
| GSM7511241 | RNAPol2-Ser5_RELA_high_(230512_SH_Mm_P2S5_RH_0506)                        |
| GSM7511242 | RNAPol2-Ser5_RELA_low_(230512_SH_Mm_P2S5_RI_0506)                         |
| GSM7511243 | RNAPol2-Ser5_Ser25_Normal_brain_1_(230410_SH_Mm_P2S525_N1_0330)           |
| GSM7511244 | RNAPol2-Ser5_Ser25_PDGFb_1_(230410_SH_Mm_P2S525_P_0330)                   |
| GSM7511245 | RNAPol2-Ser5_Ser25_RELA_1_(230404_SH_Mm_P2S525_R_0330)                    |
| GSM7511246 | RNAPol2-Ser5_Ser25_YAP1_1_(230410_SH_Mm_P2S525_Y1_0330)                   |
| GSM7511247 | RNAPol2-Ser5_Ser25_YAP3_1_(230410_SH_Mm_P2S525_Y3_0330)                   |
| GSM7511248 | RNAPol2-Ser5_YAP1_1_(230404_SH_Mm_P2S5_Y1_0330)                           |
| GSM7511249 | RNAPol2-Ser5_YAP1_2_(230503_SH_Mm_P2S5_Y95-2_0429)                        |
| GSM7511250 | RNAPol2-Ser5_YAP1_3_(230503_SH_Mm_P2S5_Y90-2_0429)                        |
| GSM7511251 | RNAPol2-Ser5_YAP1_4_(230503_SH_Mm_P2S5_Y85-4_0429)                        |
| GSM7511252 | RNAPol2-Ser5_YAP1_5_(230503_SH_Mm_P2S5_Y85-12_0429)                       |
| GSM7511253 | RNAPol2-Ser5_YAP1_6_(230503_SH_Mm_P2S5_Y80-12_0429)                       |
| GSM7511254 | RNAPol2-Ser5_YAP1_high_(230512_SH_Mm_P2S5_Y1H_0506)                       |
| GSM7511255 | RNAPol2-Ser5_YAP1_low_(230512_SH_Mm_P2S5_Y1L_0506)                        |
| GSM7511256 | RNAPol2-Ser5_YAP2_1_(230404_SH_Mm_P2S5_Y2_0330)                           |
| GSM7511257 | RNAPol2-Ser5_YAP2_high_(230512_SH_Mm_P2S5_Y2H_0506)                       |
| GSM7511258 | RNAPol2-Ser5_YAP2_low_(230512_SH_Mm_P2S5_Y2L_0506)                        |
| GSM7511259 | RNAPol2-Ser5_YAP3_1_(230410_SH_Mm_P2S5_Y3_0330)                           |
| GSM7511260 | RNAPol2-Ser5_YAP3_high_(230512_SH_Mm_P2S5_Y3H_0506)                       |
| GSM7511261 | RNAPol2-Ser5_YAP3_low_(230512_SH_Mm_P2S5_Y3L_0506)                        |
| GSM7511262 | Triton_65_K27me3_(221206_SH_Mm_K27m3_FF_TX65_1204)                        |

GSM7511263 Triton\_65\_P2S5p\_(221206\_SH\_Mm\_P2S5p\_FF\_TX65\_1204)  
 GSM7511264 Triton\_70\_P2S5p\_(221206\_SH\_Mm\_P2S5p\_FF\_TX70\_1204)  
 GSM7511265 Triton\_75\_K27me3\_(221206\_SH\_Mm\_K27m3\_FF\_TX75\_1204)  
 GSM7511266 Triton\_75\_P2S5p\_(221206\_SH\_Mm\_P2S5p\_FF\_TX75\_1204)  
 GSM7511267 Triton\_79\_K27me3\_(221206\_SH\_Mm\_K27m3\_FF\_TX79\_1204)  
 GSM7511268 Triton\_80\_K27me3\_(221206\_SH\_Mm\_K27m3\_FF\_TX80\_1204)  
 GSM7511269 Triton\_80\_P2S5p\_(221206\_SH\_Mm\_P2S5p\_FF\_TX80\_1204)  
 GSM7511270 Triton\_85\_K27me3\_(221206\_SH\_Mm\_K27m3\_FF\_TX85\_1204)  
 GSM7511271 Triton\_85\_P2S5p\_(221206\_SH\_Mm\_P2S5p\_FF\_TX85\_1204)  
 GSM7511272 Triton\_90\_K27me3\_(221206\_SH\_Mm\_K27m3\_FF\_TX90\_1204)  
 GSM7511273 Triton\_90\_P2S5p\_(221206\_SH\_Mm\_P2S5p\_FF\_TX90\_1204)  
 GSM7511274 Triton\_95\_K27me3\_(221206\_SH\_Mm\_K27m3\_FF\_TX95\_1204)  
 GSM7511275 Triton\_95\_P2S5p\_(221206\_SH\_Mm\_P2S5p\_FF\_TX95\_1204)  
 GSM7511276 H1\_H3K4me3\_whole-cell\_(230421\_SH\_Hs\_K4m3\_H1\_0405)  
 GSM7511277 K562\_H3K4me3\_40k\_whole-cell\_(230421\_SH\_Hs\_K4m3\_K1\_0405)  
 GSM7511278 K562\_H3K4me3\_100k\_whole-cell\_(230421\_SH\_Hs\_K4m3\_Kh\_0405)

GSM7746188 RNAPol2-Ser25\_Normal\_brain\_Biomag-amine\_low\_(230801\_SH\_Mm\_P2S25\_Nbl\_0727)  
 GSM7746189 RNAPol2-Ser25\_Normal\_brain\_onslide\_1\_(230801\_SH\_Mm\_P2S25s\_N1\_0727)  
 GSM7746190 RNAPol2-Ser25\_Normal\_brain\_onslide\_2\_(230801\_SH\_Mm\_P2S25s\_N2\_0727)  
 GSM7746191 RNAPol2-Ser25\_Normal\_brain\_onslide\_3\_(230801\_SH\_Mm\_P2S25s\_N3\_0727)  
 GSM7746192 RNAPol2-Ser25\_Normal\_brain\_onslide\_4\_(230801\_SH\_Mm\_P2S25s\_N4\_0727)  
 GSM7746193 RNAPol2-Ser25\_YAP1\_Biomag-amine\_low\_(230801\_SH\_Mm\_P2S25\_Ybl\_0727)  
 GSM7746194 RNAPol2-Ser25\_YAP1\_Glutathione\_high\_(230801\_SH\_Mm\_P2S25\_Yph\_0727)  
 GSM7746195 RNAPol2-Ser25\_YAP1\_Glutathione\_low\_(230801\_SH\_Mm\_P2S25\_Ypl\_0727)  
 GSM7746196 RNAPol2-Ser25\_YAP1\_onslide\_1\_(230801\_SH\_Mm\_P2S25s\_Y1\_0727)  
 GSM7746197 RNAPol2-Ser25\_YAP1\_onslide\_2\_(230801\_SH\_Mm\_P2S25s\_Y2\_0727)  
 GSM7746198 RNAPol2-Ser25\_YAP1\_onslide\_3\_(230801\_SH\_Mm\_P2S25s\_Y3\_0727)  
 GSM7746199 RNAPol2-Ser25\_YAP1\_onslide\_4\_(230801\_SH\_Mm\_P2S25s\_Y4\_0727)  
 GSM7746200 RNAPol2-Ser5\_Normal\_brain\_Biomag-amine\_low\_(230801\_SH\_Mm\_P2S5\_Nbl\_0727)  
 GSM7746201 RNAPol2-Ser5\_Normal\_brain\_onslide\_1\_(230801\_SH\_Mm\_P2S5s\_N1\_0722)  
 GSM7746202 RNAPol2-Ser5\_Normal\_brain\_onslide\_10\_(230725\_SH\_Mm\_P2S5\_N8\_0720)  
 GSM7746203 RNAPol2-Ser5\_Normal\_brain\_onslide\_2\_(230801\_SH\_Mm\_P2S5s\_N2\_0722)  
 GSM7746204 RNAPol2-Ser5\_Normal\_brain\_onslide\_3\_(230801\_SH\_Mm\_P2S5s\_N3\_0722)  
 GSM7746205 RNAPol2-Ser5\_Normal\_brain\_onslide\_4\_(230801\_SH\_Mm\_P2S5\_N1\_0720)  
 GSM7746206 RNAPol2-Ser5\_Normal\_brain\_onslide\_5\_(230801\_SH\_Mm\_P2S5\_N2\_0720)  
 GSM7746207 RNAPol2-Ser5\_Normal\_brain\_onslide\_6\_(230801\_SH\_Mm\_P2S5\_N3\_0720)  
 GSM7746208 RNAPol2-Ser5\_Normal\_brain\_onslide\_7\_(230801\_SH\_Mm\_P2S5\_N5\_0720)  
 GSM7746209 RNAPol2-Ser5\_Normal\_brain\_onslide\_8\_(230801\_SH\_Mm\_P2S5\_N6\_0720)  
 GSM7746210 RNAPol2-Ser5\_Normal\_brain\_onslide\_9\_(230801\_SH\_Mm\_P2S5\_N7\_0720)  
 GSM7746211 RNAPol2-Ser5\_PDGFb\_onslide\_10\_(230801\_SH\_Mm\_P2S5\_P1\_0720)  
 GSM7746212 RNAPol2-Ser5\_PDGFb\_onslide\_30\_(230801\_SH\_Mm\_P2S5\_P3\_0720)  
 GSM7746213 RNAPol2-Ser5\_PDGFb\_onslide\_40\_(230801\_SH\_Mm\_P2S5\_P4\_0720)  
 GSM7746214 RNAPol2-Ser5\_PDGFb\_onslide\_50\_(230801\_SH\_Mm\_P2S5\_P5\_0720)  
 GSM7746215 RNAPol2-Ser5\_PDGFb\_onslide\_60\_(230725\_SH\_Mm\_P2S5\_P6\_0720)  
 GSM7746216 RNAPol2-Ser5\_PDGFb\_onslide\_70\_(230801\_SH\_Mm\_P2S5\_P7\_0720)  
 GSM7746217 RNAPol2-Ser5\_PDGFb\_onslide\_80\_(230801\_SH\_Mm\_P2S5\_P8\_0720)  
 GSM7746218 RNAPol2-Ser5\_RELA\_onslide\_12\_(230801\_SH\_Mm\_P2S5s\_R1\_0722)  
 GSM7746219 RNAPol2-Ser5\_RELA\_onslide\_17\_(230801\_SH\_Mm\_P2S5s\_R1\_0727)  
 GSM7746220 RNAPol2-Ser5\_RELA\_onslide\_22\_(230801\_SH\_Mm\_P2S5s\_R2\_0722)  
 GSM7746221 RNAPol2-Ser5\_RELA\_onslide\_27\_(230801\_SH\_Mm\_P2S5s\_R2\_0727)  
 GSM7746222 RNAPol2-Ser5\_RELA\_onslide\_32\_(230801\_SH\_Mm\_P2S5s\_R3\_0722)  
 GSM7746223 RNAPol2-Ser5\_RELA\_onslide\_37\_(230801\_SH\_Mm\_P2S5s\_R3\_0727)  
 GSM7746224 RNAPol2-Ser5\_RELA\_onslide\_42\_(230801\_SH\_Mm\_P2S5s\_R4\_0722)  
 GSM7746225 RNAPol2-Ser5\_RELA\_onslide\_47\_(230801\_SH\_Mm\_P2S5s\_R4\_0727)  
 GSM7746226 RNAPol2-Ser5\_RELA\_onslide\_52\_(230801\_SH\_Mm\_P2S5s\_R5\_0722)  
 GSM7746227 RNAPol2-Ser5\_RELA\_onslide\_57\_(230801\_SH\_Mm\_P2S5s\_R5\_0727)  
 GSM7746228 RNAPol2-Ser5\_RELA\_onslide\_5micron27\_(230801\_SH\_Mm\_P2S5s\_5R2\_0727)  
 GSM7746229 RNAPol2-Ser5\_RELA\_onslide\_5micron37\_(230801\_SH\_Mm\_P2S5s\_5R3\_0727)  
 GSM7746230 RNAPol2-Ser5\_RELA\_onslide\_5micron47\_(230801\_SH\_Mm\_P2S5s\_5R4\_0727)  
 GSM7746231 RNAPol2-Ser5\_RELA\_onslide\_67\_(230801\_SH\_Mm\_P2S5s\_R6\_0727)  
 GSM7746232 RNAPol2-Ser5\_YAP1\_Biomag-amine\_low\_(230801\_SH\_Mm\_P2S5\_Ybl\_0727)  
 GSM7746233 RNAPol2-Ser5\_YAP1\_Glutathione\_high\_(230801\_SH\_Mm\_P2S5\_Yph\_0727)  
 GSM7746234 RNAPol2-Ser5\_YAP1\_Glutathione\_low\_(230801\_SH\_Mm\_P2S5\_Ypl\_0727)

Genome browser session  
 (e.g. [UCSC](#))

No longer applicable.

## Methodology

Replicates

At least two replicates were used for Voom/Limma analysis. All replicates were successful

Sequencing depth

All Experiments were paired-end. Sequencing depths are reported in Supplementary Data 1.



|                         |                                                                                                                                     |
|-------------------------|-------------------------------------------------------------------------------------------------------------------------------------|
| Antibodies              | All antibodies and sources are provided in the Methods section.                                                                     |
| Peak calling parameters | MACS2 version 2.2.9.1 with parameters <code>callpeak -t &lt;bed-file-of-mapped-fragments&gt; -f BEDPE --keep-dup all -p 1e-5</code> |
| Data quality            | Data quality assessment is the topic of this manuscript, and is reported.                                                           |
| Software                | <a href="https://github.com/Henikoff/FFPE">https://github.com/Henikoff/FFPE</a>                                                     |
